RESEARCH ARTICLE

# Logical validation and evaluation of practical feasibility for the SCRuM (School Clinical Rugby Measure) test battery developed for young adolescent rugby players in a resource-constrained environment

Matthew Chiwaridzo<sup>1,2,\*</sup>, Danai Chandahwa<sup>2</sup>, Sander Oorschot<sup>3</sup>, Cathrine Tadyanemhandu<sup>2</sup>, Jermaine M. Dambi<sup>2</sup>, Gillian Ferguson<sup>1</sup>, Bouwien C. M. Smits-Engelsman<sup>1</sup>

**1** Department of Health and Rehabilitation Sciences, Division of Physiotherapy, Faculty of Health Sciences, University of Cape Town, Cape Town, South Africa, **2** Rehabilitation Department, University of Zimbabwe, College of Health Sciences, Avondale, Harare, Zimbabwe, **3** Department of Rehabilitation, Academic Medical Center, University of Amsterdam, Amsterdam, Netherlands

\* [mchiwaridzo@medsch.uz.ac.zw](mailto:mchiwaridzo@medsch.uz.ac.zw)

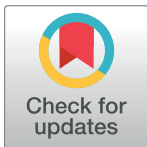

**OPEN ACCESS**

**Citation:** Chiwaridzo M, Chandahwa D, Oorschot S, Tadyanemhandu C, Dambi JM, Ferguson G, et al. (2018) Logical validation and evaluation of practical feasibility for the SCRuM (School Clinical Rugby Measure) test battery developed for young adolescent rugby players in a resource-constrained environment. PLoS ONE 13(11): e0207307. <https://doi.org/10.1371/journal.pone.0207307>

**Editor:** Dominic Micklewright, University of Essex, UNITED KINGDOM

**Received:** July 10, 2018

**Accepted:** October 29, 2018

**Published:** November 20, 2018

**Copyright:** © 2018 Chiwaridzo et al. This is an open access article distributed under the terms of the [Creative Commons Attribution License](https://creativecommons.org/licenses/by/4.0/), which permits unrestricted use, distribution, and reproduction in any medium, provided the original author and source are credited.

**Data Availability Statement:** All relevant data are available from the Dryad Digital Repository on (<https://doi.org/10.5061/dryad.kb8203f>).

**Funding:** The authors received no specific funding for this work. However, part of the PhD work by the lead investigator was partially supported by the University of Zimbabwe.

**Competing interests:** The authors have declared that no competing interests exist.

## Abstract

There is a growing impetus towards usage of test batteries in talent identification (TID) programmes in rugby. Consequently, there are many test batteries in existence profiling anthropometric, physiological characteristics and rugby-specific skills. There is no consensus in the literature on the constituent variables and corresponding tests required to inform TID programs. Following development of a new test battery called the SCRuM (School Clinical Rugby Measure), this study aimed at establishing face, logical validity and practical feasibility of included tests. The test battery, initially comprised of 23 items, had its face and logical validity evaluated by five (5) adolescent rugby coaches and 20 rugby experts, respectively. Logical validation was conducted in two questionnaire-based rounds with Content Validity Index (I-CVI) calculated for each variable. Subsequently, a cross-sectional study targeting 30 local rugby coaches was conducted to determine the perceived practical feasibility of each test item. The results showed excellent I-CVI (>0.78) for 17 variables (speed, weight, height and skin fold measures, repeated high-intensity exercise performance ability, prolonged high-intensity intermittent running ability, change of direction speed, anaerobic capacity, lower-and upper body muscular power and strength, muscular flexibility, reactive agility, passing for accuracy, tackling proficiency, and catching). However, three tests, namely, Reactive Agility, One Repetition Maximum Back Squat and One Repetition Maximum Bench Press had low test-feasibility indices (T-FI < 35) suggesting practicality concerns with implementation in the Zimbabwean context. Thus, these findings suggest the need for substitution or development of new practically feasible tests for upper-and lower body muscular strength and reactive agility.

## Introduction

Rugby union (rugby) is a popular sport even in countries hardly known for competitive rugby such as Zimbabwe [1, 2]. With the advent and subsequent global spread of professionalism in rugby since 1995 [3], an increased number of adolescents are participating either professionally or otherwise in this physically demanding collision sport worldwide [4]. Possibly, with continued professionalism and increased demand for young competent rugby players with potential to become successful future elite athletes, the number of young players is likely to increase and also efforts directed towards identifying and recruiting young rugby players will heighten universally [3–6]. Central to the process of talent identification (TID) and recruitment of young rugby talent is the development and usage of screening test batteries composed of variables reflecting the key requirements of rugby and practically feasible tests with acceptable psychometric properties [7–14]. Currently, there is no general consensus in the literature on the ideal constituent variables and the corresponding tests that should be included in test batteries designed to inform TID. Consequently, existing test batteries are varied in composition having dissimilar tests assessing similar construct variables. This is a significant shortcoming when comparison data profiling young rugby players is needed.

Despite the complexity of TID programs, the cardinal focus of such programs should be on the objective assessment of key and minimal requirements of the sport of rugby in potential players [5] utilising standardised test batteries. This implies that it is the key requirements of rugby which should provide a theoretical framework underpinning the selection of component variables for inclusion during test battery development [15]. However, in order to understand the key attributes, qualities or skills needed in rugby and, concomitantly, the variables to include in screening test batteries, knowledge of the physical demands of rugby is essential. This knowledge helps in understanding the locomotor and non-locomotor patterns common in rugby [16, 17] and, consequently, facilitates development of test batteries that replicates match demands. Furthermore, alternative approaches in understanding variables to include in test batteries involves establishing qualities, attributes or skills differentiating rugby players by levels of competition or related to match performance [18]. Identified qualities, attributes or skills with high discriminative ability and/or are associated with effective playing performance may then be incorporated in test batteries, as they potentially indicate important attributes required by rugby players.

Studies utilising Time Motion Analysis (TMA) and Global Positioning System (GPS) have shown that rugby is a dynamic, intermittent, and highly demanding physical sport [17, 19–29]. It is known that regardless of level of competition, rugby players spend 79% to 94% of match time in low-intensity activities (LIA), interrupted briefly by moderate-to-high intensity running or non-running activities such as striding, cruising, sprinting, static exertions (rucking, mauling, scrummaging), and tackling [17, 25–33]. It is these short, high-intensity activities (HIA) that are most crucial in rugby, possibly determining the outcome of rugby matches in terms which team win or lose a particular rugby match. Accordingly, understanding the key characteristics and skills needed to repeatedly perform these intense activities for the duration of a rugby match should have important implications in test battery design. Additionally, static exertions and power-based tasks such as tackling occur throughout the game of rugby and require high levels of upper-and-lower body muscular strength and power [17, 34]. As such, numerous studies have documented evidence of the relationship between these physiological characteristics and future career success or team selection [3, 34–38]. Therefore, it seems logical to include measurements of upper-and-lower body muscular strength and power in test batteries designed for screening potential rugby talent in TID programs given and also for general profiling of rugby players given the importance of these characteristics in rugby.

Literature has also shown that sprinting efforts over short and long distances are key movement patterns commonly observed in rugby for both forward and back players [25, 32, 33, 39–43]. Therefore, testing of speed is important and should be over varied distances reflecting the requirements for the different positions. With repeated efforts, both sprinting and static exertions require some degree of endurance considering 70 or 80 minutes of match play [17, 31, 44–46]. Thus, the ability to perform repeated HIA is essential and potentially important to screen for when identifying talent [47, 48]. Specifically, repeated sprinting ability (RSA) and repeated high-intensity exercise (RHIE) performance ability should be important components in test batteries [34, 47–51]. Smart et al [51] showed an association between speed and RSA with tries scored in a match, suggesting the importance of these characteristics in relation to match performance. Additionally, Gabbett [48] reported moderate to large effect size differences between the starters and non-starters rugby league players for speed, change of direction speed (CODS) and aerobic capacity, further illustrating the importance of these characteristics.

Pienaar et al [52] assembled a test battery measuring 21 anthropometric variables, eight (8) motor and physical abilities and six (6) games skills for identifying young South African rugby players. Also, test batteries utilised by Van Gent and Spamer [53] and Spamer and De la Port [54] for the same population had a similar multi-dimensionality. However, critical appraisal of these test batteries showed that the rationale for inclusion of the test items was seldom provided in the content of the articles and several variables were missing which would have given sufficient logical validity to the test batteries that are designed particularly for profiling anthropometric, physical, physiological abilities and rugby-specific skills among young players. Variably, the batteries excluded tests for tackling, reactive agility, RHIE performance ability, repeated effort ability (REA), (an)aerobic capacity, and lower-body muscular strength and power which probably emphasise the intermittency and physical nature of rugby. It is, therefore, imperative when developing test batteries for young adolescent rugby players to include test items that logically and comprehensively reflects the demand components of the game and has reliable, valid and feasible tests for the context it is to be implemented. Test batteries that are logically validated to the needs of the young rugby players containing also practically feasible tests are more likely to be relevant for use in screening or talent recruitment programs and to be implemented by the intended users such as coaches, strength and conditioning experts and sports scientists. Such test batteries can be consistently used to determine players' competency levels, TID, creating a profile of each individual athlete, tracking progress over time and also evaluating the effectiveness of interventions [12]. Therefore in an attempt to comprehensively understand the key physical, physiological and skill-based needs of young male adolescent rugby players between the ages of Under 16 and Under 20, based on shared consensus among rugby experts, this study evaluated the logical validity of the test variables included in a newly-developed test battery called the School Clinical Rugby Measure (SCRuM) and, further evaluated the practical feasibility of each corresponding test in the test battery in the Zimbabwean context. In the broader context of the large doctoral study in which this study was part of, the test battery was developed with the ultimate aim of determining anthropometric, physical or physiological characteristics and rugby-specific game skills discriminating young (U16-U20) Zimbabwean male rugby players by level of competition.

## Material and methods

### Test battery development

The present study was conducted as part of a large multi-phased study (Table 1). Briefly, Phase I entailed development of the first version of the SCRuM test battery through a three-part process (Table 1). The process was informed by literature recommendations for instrument or test

**Table 1. Methodological stages used to develop and validate the SCRuM test battery.**

| Phase   | Part     | Aim                                                                                                                                                                                                                                                                                     | Methodology                                                 |
|---------|----------|-----------------------------------------------------------------------------------------------------------------------------------------------------------------------------------------------------------------------------------------------------------------------------------------|-------------------------------------------------------------|
| Phase 1 | Part I   | Determined what is known about the key requirements of rugby specifically targeting anthropometric, physical or physiological characteristics and rugby specific game skills in literature.                                                                                             | Narrative literature review                                 |
|         | Part II  | Explored perceptions of rugby coaches on the key attributes or qualities and game skills needed in rugby and should be incorporated in test batteries for TID programs. This part also sought commonly used test (s) for the identified attributes and skills used in the local context | A qualitative study                                         |
|         | Part III | Determined frequently assessed physical or physiological characteristics and rugby-specific game skills and their corresponding tests in literature and evaluate the psychometric properties of each identified tests per construct [10, 11].                                           | Systematic review                                           |
| Phase 2 | Part I   | Determined face validity of the first version of SCRuM test battery.                                                                                                                                                                                                                    | Face validation study using key informants                  |
|         | Part II  | Determined the logical validity of the second version of the SCRuM test battery. Logical validity was assessed in two rounds, engendering the third and fourth version.                                                                                                                 | Logical validation study using rugby experts                |
|         | Part III | Assessed the practical feasibility of the test items in the fourth version of the SCRuM test battery, engendering the fifth version of the SCRuM test battery.                                                                                                                          | Cross-sectional descriptive study using local rugby coaches |
| Phase 3 | Part I   | Assessment of the test-retest reliability of the fifth version of the SCRuM test battery, engendering the sixth version if there are changes to the content of the fourth version.                                                                                                      | Test-retest reliability study                               |
|         | Part II  | Assessment of the construct (discriminative) validity of the sixth version of the SCRuM test battery engendering the final version of the SCRuM test battery with tests able to discriminate young male rugby players by level of competition                                           | Construct validation study                                  |

<https://doi.org/10.1371/journal.pone.0207307.t001>

battery development [55–58]. However, the actual selection of the candidate items and corresponding tests considered interplay of several factors such as:

1. The physical, motor or physiological characteristics and rugby-specific technical game skills identified to be commonly assessed in the literature.
2. The tests frequently used for the assessment of each of the identified construct in rugby and other related intermittent sports such as rugby league. However, tests found specifically developed for rugby players were preferentially selected for inclusion over generic tests for the corresponding variable.
3. The qualities, attributes or skills local rugby coaches perceived to be important in defining a good rugby player and are important for consideration during talent recruitment in TID programs.
4. The tests known and frequently used by rugby coaches in the local context during training or for assessment of players.
5. The availability of acceptable psychometric or measurement properties (reliability, validity and responsiveness) for the test based on the Consensus-based Standards for the Selection of health Measurement Instruments (COSMIN) checklist.
6. The level of evidence for the test based on “best evidence synthesis” of the psychometric properties based on the the quality criteria for rating of measurement properties provided by Terwee et al [59].

The authors (MC, BSE, SO) formed the working group that selected the test items for the SCRuM test battery largely guided by the ultimate purpose of the test battery and the factors alluded above.

S1 Table shows the first version of the SCRuM test battery and the rationale for choosing each included test. Following development, the test battery was subsequently evaluated for face and logical validity and practical feasibility. This is the part described in this paper. For ease of

understanding, the present study was separated into three parts (Part I, II, III) and describes the methods and results for each of these parts.

### Part 1: Face validation of the test battery

Although face validity is not considered an active measure of validity, it yields subjective but important preliminary information on whether study instruments measure what they purport to measure [60]. For the present study, face validity was considered as the extent to which the SCRuM test battery appeared to have component variables measuring the following pre-selected domain constructs: anthropometric, physical or physiological and rugby-specific game skills. Moreover, each test was assessed considering the degree to which it “looked” to be measuring the corresponding variable [61]. The study targeted key informant coaches coaching first team male rugby players from schools in the “elite” Super Eight Schools Rugby League (SESRL) and “sub-elite” Co-Educational Schools Rugby League (CESRL [2] based in Harare, Zimbabwe. The SESRL and CESRL represent the most competitive domestic high school rugby leagues in the country. A researcher-developed questionnaire listed all the SCRuM variables, corresponding tests and details of the test procedure. Participants rated each test based on a Likert scale (1 = strongly disagree, 2 = disagree, 3 = neutral, 4 = agree, 5 = strongly agree) depending on whether the test appeared to be measuring the corresponding variable. Arbitrarily, at least 50% of the respondents had to agree or strongly agree for a test to be considered as having face validity. The questionnaire also elicited qualitative comments for any test item judged 1, 2 and 3. Respondents also had to provide a comment on whether the test battery adequately reflected a compilation of anthropometric, physical or physiological characteristics and rugby-specific game skills. Ethical approval was obtained from the Human Research Ethics Committee at the University of Cape Town (ref: 016/2016) where the lead author is registered as an international doctoral student in the School of Health and Rehabilitation Sciences in the Division of Physiotherapy. In addition, ethical approval was subsequently sought and obtained from the Medical Research Council of Zimbabwe (ref: MRCZ/A/2070), since the study was conducted in Zimbabwe. Also ethical clearance was sought and obtained from the Joint Research Ethics Committee for the University of Zimbabwe, College of Health Sciences and Parirenyatwa Group of Hospitals (JREC ref 418/17), since part of the data was used by one of the co-authors (DC) as part of her undergraduate research project in physiotherapy in the Department of Rehabilitation. Identified rugby coaches provided written informed consent prior to data collection.

### Results

Five (5) high school male coaches, with the median age of 45 years, volunteered to participate in the study (Table 2). Overall, the coaches endorsed the face validity of the SCRuM test battery. However, four of the respondents felt that the Multistage Fitness Test (MSFT) measuring maximal aerobic power was a “duplication” of the Yo-Yo Intermittent Recovery Level I (Yo-Yo IRL1) Test measuring PHIRA/endurance.

### Part 2: Logical validity

After the preliminary face validation using coaches identified as key informants, the test battery was subjected to detailed evaluation of its content using rugby experts. Although the term content validity is commonly applied for questionnaires [62], in the context of performance measures the term addresses questions such as “how well a specific test measures what it intends to measure?” or “do the items included in the test cover the entirety of those relevant to assessing a particular skill outcome measure?” [13]. Terms such as logical or definitional

Table 2. Face validation results of the newly- assembled SCRuM test battery (N = 5).

| SCRuM variable item   | Corresponding test                                    | Likert scale responses |             |            |          |             | Decision to include/exclude |
|-----------------------|-------------------------------------------------------|------------------------|-------------|------------|----------|-------------|-----------------------------|
|                       |                                                       | S. Disagree, n         | Disagree, n | Neutral, n | Agree, n | S. Agree, n |                             |
| Speed                 | 5m, 10m, 20m, 40m speed test                          | 0                      | 0           | 0          | 0        | 5           | Included                    |
| RSA                   | Rugby-specific repeated speed (RS <sup>2</sup> ) test | 0                      | 0           | 0          | 3        | 2           | Included                    |
| REA                   | REA test                                              | 0                      | 0           | 0          | 4        | 1           | Included                    |
| RHIE performance      | RHIE performance test                                 | 0                      | 0           | 0          | 3        | 2           | Included                    |
| PHIIRA/endurance      | Yo-yo intermittent recovery level 1 test              | 1                      | 1           | 0          | 2        | 1           | Included                    |
| Maximal aerobic power | Multistage fitness test                               | 1                      | 3           | 0          | 1        | 0           | Excluded                    |
| Anaerobic capacity    | Triple 120m shuttle test                              | 1                      | 0           | 0          | 3        | 1           | Included                    |
| CODS/agility          | L-run test                                            | 0                      | 0           | 0          | 0        | 5           | Included                    |
| LB muscular power     | Vertical jump test                                    | 0                      | 0           | 0          | 3        | 2           | Included                    |
| LB muscular strength  | One repetition maximum back squat test                | 0                      | 0           | 0          | 1        | 4           | Included                    |
| UB muscular power     | 2kg medicine ball chest throw test                    | 0                      | 0           | 0          | 2        | 3           | Included                    |
| UB muscular strength  | One repetition maximum bench press                    | 0                      | 0           | 0          | 3        | 2           | Included                    |
| UB muscular endurance | Flexed arm hang                                       | 0                      | 0           | 0          | 5        | 0           | Included                    |
| Abdominal endurance   | 60seconds sit up test                                 | 0                      | 0           | 0          | 4        | 1           | Included                    |
| Reactive agility      | Reactive agility test                                 | 0                      | 0           | 0          | 5        | 0           | Included                    |
| Tackling              | Tackling proficiency test                             | 0                      | 0           | 0          | 1        | 4           | Included                    |
| Catching              | Running and catching test                             | 0                      | 0           | 0          | 4        | 1           | Included                    |
| Kicking               | Kicking for distance test                             | 0                      | 1           | 0          | 4        | 0           | Included                    |
| Passing for distance  | Passing for distance test                             | 0                      | 0           | 0          | 2        | 3           | Included                    |
| Passing for accuracy  | Passing for accuracy test                             | 0                      | 0           | 0          | 2        | 3           | Included                    |

Anthropometric measures and body composition (skin folds) were omitted in the tables. All coaches agreed to strongly agree for inclusion for those variables; Repeated Sprinting Ability-RSA; PHIIRA-prolonged high intensity intermittent running ability; S.Disagre-Strongly Disagree; S.Agree-Strongly Agree; UB-Upper body; LB-Lower body; REA-repeated effort ability

<https://doi.org/10.1371/journal.pone.0207307.t002>

validity have also been used interchangeably with content validity [58]. It appears, however, that logical validity is often applied for sports-based tests [8, 55, 63, 64]. For example, Rikli and Jones [55] described logical validity as the degree to which a test (or a test battery) reflects a defined domain of interest. According to Hendricks et al [8], the fundamental question describing logical validity of a rugby test is “does the test measure a relevant and important aspect of rugby?”

### First round

This first round was designed to establish the logical validity of the 22 variables and their corresponding tests in the SCRuM test battery. The COSMIN checklist provided the definitional guideline for logical validity [61]. Logical validity was established through two rounds of expert consultations. Panellists assessed the relevance of SCRuM test battery items by age, gender and overall purpose of the test battery as per the COSMIN guidelines. The primary objective was to determine component items with acceptable Content Validity Index (CVI). Secondly, the study sought to identify characteristics and their corresponding tests missing in the SCRuM test battery but highly recommended for inclusion by at least half of the participating rugby experts.

International and local rugby experts participated in the study. International experts were selected based on being Professors or PhD holders having at least three publications on rugby. The recruitment of local experts was premised on identifying a representative sample of experts with at least 5 years of coaching or playing or directing or involved in rugby in Zimbabwe. A researcher-developed logical validation instrument was used for data collection.

Experts rated the relevance of each SCRuM variable based on a Likert scale as follows: 1 = *test not relevant*, 2 = *test somewhat relevant*, 3 = *test quite relevant*, 4 = *test highly relevant* [65]. In addition, experts had to comment for test variables rated 1 or 2, recommend missing variables and corresponding test(s).

**Procedure.** This study was conducted between January and February 2018. Possible candidate names for international experts were obtained from an online document listing “top” 100 experts in sports science [66] and also from reference lists of two systematic reviews conducted by the lead author [10, 11]. This was done to determine the authors frequently publishing on physical characteristics and rugby-specific game skills. So, these two strategies provided the sampling frame for the international experts. However, the actual decision for the selection of international experts was based on consensus agreement among three authors (MC, DC and BSE) considering factors such as (i) availability of active and recent email address, (ii) availability of the expert on Research Gate (a research platform enabling us to evaluate expert publications, academic qualifications and biographies) (iii) availability on social media platforms such as LinkedIn or Twitter (an additional invitational platform for experts when emails “bounce”), and (iv) number of publications pertaining to rugby on PubMed or Google Scholar. Email addresses of selected experts were mainly obtained from journal articles and university webpages. In total, 43 international experts were identified and invited to participate via email. Experts were furnished with the online questionnaire through REDCap (a secure web application for building and managing online surveys). For the local experts, purposive sampling method was used for the recruitment, with participants assisting in identifying others (snowballing). In total, 20 local rugby experts were approached and those who agreed to participate signed the informed consent form.

**Statistical analysis.** Item-Content Validity Index (I-CVI) was computed for each test item as the number of experts giving a rating of either 3 or 4 divided by the total number of experts [67–69]. CVI is the most widely used quantitative approach for the content validation [58, 67]. The adopted cut-off for an acceptable I-CVI was  $>0.78$  [68]. Each test item with I-CVI  $>0.78$  was deemed relevant for inclusion in the test battery. The percentage agreement (the number of test items with an I-CVI of 1.00 divided by the total number of items validated in the test battery, expressed as a percentage) was also calculated to represent the proportion of test items experts deemed highly relevant. Scale level-Content Validity Index (S-CVI) was mathematically computed as an average of all I-CVIs [68]. This represented the overall logical validity of the SCRuM test battery. A second round of validation was needed when the S-CVI/Ave for the test battery was below the acceptable cut-off of 0.90 [68]. In addition, an index of inter-rater agreement adjusting for chance agreement [58] was calculated for each test item as indicated in Larsson et al [67].

**Results.** We invited 63 local and international experts of whom 20 (31.7%) agreed to participate. The eight international experts represented United Kingdom (5), South Africa (1), Australia (1) and New Zealand (1). The experts were either professors or PhD holders in human movement sciences, sports physiotherapy or medicine and with preferential interest in rugby. The length of experience ranged from 13 to 25 years mainly in lecturing and sport science research. Of the 12 local experts, they included two (2) sport scientists, senior rugby coaches, and former Zimbabwe national team rugby players, one (1) current Zimbabwe senior national team rugby player, former Zimbabwe national rugby team coach, former Zimbabwe national rugby team sports director, former Zimbabwe national Under-19 team manager, junior rugby sports director at a local school, and physiotherapist for the Zimbabwe national rugby team. Table 3 summarises the rating of each of the variables in the SCRuM test battery.

The calculated I-CVIs and the corresponding modified kappa coefficient values for each test item in the SCRuM test battery are shown in Table 4. The calculated I-CVIs ranged from

Table 3. Results for first part of the content validation study.

| SCRuM variable        | R1 | R2 | R3 | R4 | R5 | R6 | R7 | R8 | R9 | R10 | R11 | R12 | R13 | R14 | R15 | R16 | R17 | R18 | R19 | R20 |
|-----------------------|----|----|----|----|----|----|----|----|----|-----|-----|-----|-----|-----|-----|-----|-----|-----|-----|-----|
| Speed                 | 4  | 4  | 4  | 4  | 4  | 4  | 4  | 3  | 4  | 4   | 4   | 4   | 3   | 4   | 4   | 4   | 4   | 4   | 4   | 4   |
| RSA                   | 4  | 4  | 4  | 2  | 4  | 2  | 3  | 3  | 3  | 4   | 4   | 2   | 4   | 4   | 4   | 4   | 4   | 3   | 4   | 3   |
| REA                   | 2  | 4  | 2  | 2  | 4  | 4  | 4  | 3  | 1  | 4   | 4   | 2   | 4   | 4   | 4   | 3   | 4   | 3   | 3   | 4   |
| RHIE                  | 1  | 4  | 1  | 4  | 3  | 4  | 4  | 3  | 4  | 4   | 4   | 4   | 4   | 4   | 4   | 4   | 4   | 3   | 3   | 2   |
| PHIIRA/Endurance      | 4  | 4  | 4  | 3  | 3  | 3  | 4  | 2  | 4  | 4   | 4   | 4   | 3   | 3   | 4   | 4   | 4   | 4   | 4   | 4   |
| Anaerobic capacity    | 4  | 4  | 4  | 2  | 3  | 4  | 2  | 2  | 2  | 4   | 3   | 3   | 4   | 4   | 4   | 4   | 3   | 4   | 4   | 4   |
| CODS/agility          | 4  | 4  | 4  | 4  | 4  | 2  | 3  | 3  | 4  | 4   | 4   | 4   | 3   | 4   | 4   | 3   | 3   | 4   | 4   | 3   |
| LB muscular power     | 4  | 4  | 4  | 4  | 4  | 4  | 4  | 3  | 4  | 4   | 4   | 4   | 4   | 4   | 4   | 4   | 4   | 3   | 4   | 4   |
| LB muscular strength  | 4  | 4  | 4  | 4  | 4  | 4  | 4  | 3  | 4  | 4   | 4   | 4   | 4   | 4   | 4   | 4   | 4   | 3   | 3   | 4   |
| UB muscular strength  | 4  | 4  | 4  | 4  | 3  | 3  | 4  | 3  | 4  | 4   | 4   | 4   | 4   | 3   | 4   | 4   | 4   | 4   | 4   | 4   |
| UB muscular power     | 4  | 4  | 4  | 3  | 4  | 3  | 4  | 3  | 4  | 4   | 4   | 4   | 4   | 4   | 3   | 4   | 4   | 3   | 3   | 3   |
| UB muscular endurance | 4  | 4  | 4  | 2  | 3  | 1  | 3  | 2  | 2  | 4   | 2   | 4   | 3   | 3   | 3   | 4   | 3   | 3   | 4   | 3   |
| Abdominal endurance   | 2  | 4  | 2  | 2  | 3  | 3  | 2  | 1  | 1  | 4   | 2   | 1   | 3   | 4   | 3   | 4   | 3   | 3   | 3   | 3   |
| Reactive agility      | 4  | 4  | 4  | 3  | 3  | 4  | 3  | 3  | 4  | 4   | 4   | 3   | 4   | 4   | 4   | 3   | 4   | 3   | 4   | 4   |
| Tackling              | 4  | 4  | 4  | 4  | 4  | 4  | 4  | 2  | 4  | 4   | 4   | 3   | 4   | 4   | 4   | 4   | 4   | 3   | 4   | 4   |
| Catching              | 4  | 4  | 4  | 4  | 4  | 4  | 4  | 2  | 4  | 4   | 4   | 4   | 4   | 4   | 4   | 4   | 3   | 4   | 4   | 3   |
| Kicking               | 4  | 4  | 4  | 2  | 3  | 2  | 3  | 2  | 1  | 4   | 2   | 4   | 2   | 3   | 3   | 3   | 2   | 4   | 3   | 4   |
| Passing for distance  | 4  | 4  | 4  | 2  | 4  | 2  | 3  | 2  | 1  | 4   | 2   | 4   | 2   | 4   | 3   | 3   | 2   | 4   | 4   | 4   |
| Passing for accuracy  | 4  | 4  | 4  | 4  | 4  | 4  | 4  | 3  | 3  | 3   | 4   | 4   | 4   | 4   | 3   | 3   | 4   | 4   | 3   | 4   |
| Height                | 4  | 4  | 4  | 4  | 4  | 4  | 4  | 4  | 4  | 4   | 4   | 4   | 4   | 4   | 4   | 4   | 4   | 4   | 4   | 4   |
| Weight                | 4  | 4  | 4  | 4  | 4  | 4  | 4  | 4  | 4  | 4   | 4   | 4   | 4   | 4   | 4   | 4   | 4   | 4   | 4   | 4   |
| Skin folds            | 4  | 4  | 4  | 4  | 4  | 4  | 4  | 4  | 4  | 4   | 4   | 4   | 4   | 4   | 3   | 4   | 4   | 4   | 4   | 4   |

R = Rater; 1 = not relevant, 2 = somewhat relevant, 3 = quite relevant, 4 = highly relevant; Prolonged high intensity intermittent running ability = PHIIRA; Repeated sprinting ability = RSA; Repeated effort ability = REA; Repeated High Intensity Exercise Performance = RHIE; Maximal Aerobic Power = MAP; Change of direction speed = CODS; LB = lower body; UB = upper body.

<https://doi.org/10.1371/journal.pone.0207307.t003>

0.6 to 1. Overall, the test battery achieved an S-CVI/Ave of 0.86. Ten variables had excellent kappa values ( $k = 1$ ). Hence, the percentage agreement for the SCRuM test battery was 43.5%. Five (5) variables were excluded and the reasons are shown in Table 4. Thematic analysis of the recommended attributes showed that “muscle flexibility” was highly recommended by 13 (65%) of the experts. However, Sit-and-Reach test was reported as the most commonly used test for the variable. The other attributes and skills recommended for inclusion were: defensive and offensive skills ( $n = 2$ ), balance ( $n = 3$ ), anticipatory or reaction skills ( $n = 3$ ), abdominal strength ( $n = 2$ ) and ball rucking ( $n = 1$ ).

### Second round

A second round was needed for the experts to review the findings for the first round. In addition, experts had to judge the relevance of muscle flexibility as a characteristic important for inclusion in the test battery, and report on the most commonly assessed muscle for flexibility. The experts had to give an overall impression on whether they agreed or disagreed that the test battery was sufficiently comprehensive in covering all relevant physical or physiological and rugby-specific game skills. Procedurally, this entailed sending or providing a summary of the results of the first round to experts via email or in person. Overall, the proportion of agreement among the experts was calculated as a measure of comprehensiveness of the SCRuM test battery. The relevance of inclusion for muscle flexibility was evaluated as previously described using the CVI calculation method.



**Table 4. Item-content validity indices for the SCRuM test items.**

| Scrum variables       | Relevant (3 or 4) | Not relevant (1 or 2) | I-CVI | Kappa (k) | Interpretation  | rationale for exclusion                                                  |
|-----------------------|-------------------|-----------------------|-------|-----------|-----------------|--------------------------------------------------------------------------|
| Speed                 | 20                | 0                     | 1     | 1         | Validated       |                                                                          |
| RSA                   | 17                | 3                     | 0.85  | 0.85      | Validated       |                                                                          |
| REA                   | 15                | 5                     | 0.75  | 0.75      | <b>Excluded</b> | It mimics RHIE and is not as important as RHIE                           |
| RHIE                  | 17                | 3                     | 0.85  | 0.85      | Validated       |                                                                          |
| Endurance/PHIIRA      | 19                | 1                     | 0.95  | 0.95      | Validated       |                                                                          |
| Anaerobic capacity    | 16                | 4                     | 0.8   | 0.8       | Validated       |                                                                          |
| CODS/Agility          | 19                | 1                     | 0.95  | 0.95      | Validated       |                                                                          |
| LB muscular power     | 20                | 0                     | 1     | 1         | Validated       |                                                                          |
| LB muscular strength  | 20                | 0                     | 1     | 1         | Validated       |                                                                          |
| UB muscular power     | 20                | 0                     | 1     | 1         | Validated       |                                                                          |
| UB muscular strength  | 20                | 0                     | 1     | 1         | Validated       |                                                                          |
| UB muscular endurance | 15                | 5                     | 0.75  | 0.75      | <b>Excluded</b> | Not common and relevant in rugby, indirectly assessed by other variables |
| Abdominal endurance   | 12                | 8                     | 0.6   | 0.6       | <b>Excluded</b> | Not common and little evidence supporting its relevance in rugby         |
| Reactive agility      | 20                | 0                     | 1     | 1         | Validated       |                                                                          |
| Tackling              | 19                | 1                     | 0.95  | 0.95      | Validated       |                                                                          |
| Passing for distance  | 13                | 7                     | 0.65  | 0.65      | <b>Excluded</b> | Not regarded as important as compared to passing for accuracy.           |
| Passing for accuracy  | 20                | 0                     | 1     | 1         | Validated       |                                                                          |
| Catching              | 19                | 1                     | 0.95  | 0.95      | Validated       |                                                                          |
| Kicking for distance  | 13                | 7                     | 0.65  | 0.65      | <b>Excluded</b> | Position dependent                                                       |

RHIE-repeated high intensity exercise; LB-lower body; UB-upper body; PHIIRA-prolonged high intensity intermittent running ability; CODS-change of direction speed, results for anthropometric variables are excluded from the table

<https://doi.org/10.1371/journal.pone.0207307.t004>

**Results.** Out of the 20 experts invited to participate, three (3) international experts timeously responded. Additionally, six (6) local experts were available to participate in the study. Of the 18 variables, RSA was considered not essential for inclusion in the test battery. Experts felt that RSA was already incorporated in the RHIE test. There were also suggestions from three (3) experts for the removal of anaerobic capacity (measured by the Triple 120m shuttle test), since it could be indirectly assessed using the RHIE tests. Muscle flexibility had an I-CVI of 0.89 from eight (8) raters. According to the experts (n = 7), the lower back and hamstring muscle flexibility is commonly assessed in rugby. Overall, all the rugby experts agreed on the comprehensiveness of the test battery in including a wide range of physical or physiological characteristics and rugby-specific skills.

### Part 3: Practical feasibility

This study was conducted to establish the practical feasibility of conducting each of the tests in the logically-validated SCRuM test battery. Literature advocates for the development of test batteries that are feasible, reliable and valid [8, 13, 14, 70]. Feasibility concerns are multifaceted and include assessment of parameters such as equipment needed, cost of equipment, time, procedure, human resources needed, ease of scoring and interpreting test results, safety and duration of the test [8, 13, 14, 70].

### Study design and participants

A cross-sectional descriptive study targeting rugby coaches from high schools and senior rugby clubs in Harare, Zimbabwe was conducted. Coaches were targeted because of their

potential in applying the findings of this study in their work environment. For the identification of the rugby coaches, high schools in Harare were categorised into SESRL, CESRL, and IHSRL (Interscholastic High School Rugby Leagues). All the rugby coaches in the SESRL and CESRL were invited to participate by virtue of their schools participating in the reputable leagues. However, a random selection of the schools ( $n = 48$ ) was conducted for the identification of the coaches in the IHSRL. The league is composed of public and private amateur rugby schools which do not participate in the SESRL or CESRL. All the rugby coaches in the selected schools were then invited to participate. Additionally, senior rugby club coaches were approached on individual basis for possible participation in the study.

### Instrument

A practical feasibility instrument was specifically designed for this study ([S1 Appendix](#)). Briefly, Section A elicited demographic data and rugby-related information of the coaches with regards to age, gender, high school or club coaching experience (years started coaching, rugby school team coaches, the league the school is in, any other coaching experience besides school or club rugby) and personal rugby experience (whether they have played rugby in their lifetime, and the level they played). Section B was the feasibility data scoring sheet requesting the coaches to rate the practical feasibility of the each test in the SCRuM test battery as follows: 0-not practically feasible, 1-somewhat feasible, 2-practically feasible. The three main feasibility parameters evaluated included:

1. Test equipment issues: evaluating type of equipment needed and cost of purchasing it.
2. Test procedural issues: evaluating the ease of conducting the ideal procedure and the alternative procedure of the test, duration of test, human personnel needed, and easy of scoring and interpreting test results.
3. Test acceptability issues: evaluating logical acceptability/perceived appropriateness, age-specificity, and safety concerns of the test.

### Procedure

A total of 22 high-schools based in Harare, Zimbabwe were invited to participate. School rugby coaches in these schools willing to participate in the study were recruited. Male head coaches from five (5) senior professional rugby clubs were approached on individual basis and invited to participate in the study. Written informed consent was obtained from the participants. Upon agreeing to participate, the coaches were given the following study documents: the practical feasibility questionnaire and the SCRuM test battery informative document. The latter document had detailed information about each test in the test battery including information on every feasibility parameter from the type of equipment needed, estimated cost of purchasing the equipment, test procedural issues, anticipated duration and human resources needed, ways of scoring and interpreting test results, to information on test acceptability issues.

### Statistical analysis

The 10 feasibility parameters were grouped into three categories based on perceived importance of each parameter:

1. High-Priority Feasibility Parameters (HPFPs): This included equipment needed, procedure of the test, possible modifications to the test or equipment, and cost analysis. These four (4)

parameters were considered by the research team as the key determinants of practical feasibility of each test. Participants had to rate the feasibility of each test on the aforementioned four parameters based on: 0-not feasible, 1-somewhat feasible and 2-feasible. The total weighted score for HPFPs was 32 (calculated as the maximum possible feasibility scores for HPFPs, which was 8, multiplied by an arbitrary weighted ratio of 4).

2. Medium-Priority Feasibility Parameters (MPFPs): This included average duration, human resources needed, scoring and interpretation of test scores. These three (3) parameters were considered of moderate importance to practical feasibility. For each of these parameters, each test was rated based on: 0-not feasible, 1-somewhat feasible and 2-feasible. The total weighted score for MPFPs was 12 (calculated as the maximum possible feasibility scores for MPFPs, which is 6, multiplied by an arbitrary weighted ratio of 2 representing moderate importance).
3. Low-Priority Feasibility Parameters (LPFPs): This included age-specificity, logical acceptability and safety. These three (3) parameters were considered of least concern with regards to practical feasibility. For each of these parameters, each test was rated as follows: 0-not feasible, 1-somewhat feasible and 2-feasible. The total weighted score for LPFPs was 6 (calculated as the maximum possible feasibility scores for LPFPs, which is 6, multiplied by a weighted ratio of 1).

The maximum possible weighted total score for the each test item was 50. The calculated average score of each test represented the Test-Feasibility Index (T-FI). T-FI scores were dichotomised for interpretation into high ( $\geq 35$ ) and low. Tests with low T-FI warranted complete substitution from the test battery.

## Results

Thirty (30) male junior rugby and senior rugby club coaches volunteered to participate in the study. The mean age of the coaches was 43.6 years (SD = 4.49, age range = 36–56). The total number of years coaching either school or club rugby ranged from 3 to 18 years for the coaches. Of the 17 tests in the SCRuM test battery, the majority ( $n = 14$ ) were perceived to be practically feasible to be conducted in the local setting (Table 5). Three tests, namely, Reactive Agility Test (RAT), One Repetition Maximum Back Squat (1RM BS) and One Repetition Maximum Bench Press (1RM BP) had average T-FIs below  $> 35$ . Specifically for the RAT, participants had concerns on the type of equipment needed and the cost of the equipment. For the 1RM BP and 1RM BS tests, feasibility concerns raised were mainly on equipment needed, cost of equipment, age-specificity of the tests and logical acceptability of the tests.

## Discussion

The present study was conducted to evaluate the logical or content validity and the practical feasibility of each test item in the newly-designed SCRuM test battery developed for use in a large study to determine the anthropometric, physical, physiological and rugby-specific game skills discriminating young male adolescent rugby players by playing abilities and level of competition. Briefly, the test battery had been developed from information gathered through a narrative and systematic literature review [10, 11] combined with results from a qualitative study investigating the perceptions of local rugby coaches of the qualities important in rugby for young adolescent rugby players and the corresponding tests used for evaluation of these qualities. This study was therefore carried out to refine the first version of the SCRuM test battery by evaluating the relevance, comprehensiveness of the test items included in the test battery based on rugby experts perceptions and further ascertain the practical feasibility of conducting

**Table 5. Practical feasibility results based on coaches assessment of the SCRuM test battery (n = 30).**

| Construct measured       | Corresponding test                       | Average Feasibility Index Score (T-FI) | Interpretation                   |
|--------------------------|------------------------------------------|----------------------------------------|----------------------------------|
| Speed                    | 5m, 10m, 20m, 40m speed test             | 41.9                                   | High practical feasibility       |
| RHIE performance ability | RHIE test                                | 36.5                                   | High practical feasibility       |
| PHIIRA/Endurance         | Yo-yo intermittent recovery level 1 test | 40.8                                   | High practical feasibility       |
| Anaerobic capacity       | Triple 120m shuttle test                 | 42.2                                   | High practical feasibility       |
| CODS/agility             | L-run test                               | 43.6                                   | High practical feasibility       |
| LB muscular power        | Vertical Jump test                       | 42.7                                   | High practical feasibility       |
| LB muscular strength     | 1RM back squat test                      | 22.6                                   | <b>Low practical feasibility</b> |
| UB muscular strength     | 1RM bench press test                     | 23.0                                   | <b>Low practical feasibility</b> |
| UB muscular power        | 2kg medicine ball chest throw test       | 43.6                                   | High practical feasibility       |
| Muscle flexibility       | Sit-and-Reach test                       | 48.1                                   | High practical feasibility       |
| Reactive agility         | Reactive Agility test                    | 32.2                                   | <b>Low practical feasibility</b> |
| Tackling                 | Tackling proficiency test                | 41.0                                   | High practical feasibility       |
| Passing for accuracy     | Passing for accuracy test                | 40.1                                   | High practical feasibility       |
| Catching                 | Running and catching test                | 40.9                                   | High practical feasibility       |

T-FI = Test feasibility index, RHIE = repeated high intensity exercise, CODS-change of direction speed, PHIIRA-prolonged high intensity intermittent running ability, 1RM = one repetition maximum.

<https://doi.org/10.1371/journal.pone.0207307.t005>

the various test items included in the test battery as judged by the local high school coaches likely to be intended users of the test battery.

The primary finding of this present study was that 17 out of the initial 23 variables were considered relevant for inclusion in the SCRuM test battery. This breadth highlights the diversity of physiological or physical qualities and game-specific skills needed by young rugby players between the ages of Under-16 to Under-20 irrespective of position. Another important secondary finding was that proposed tests for upper-and-lower body muscular strength and reactive agility that were included in the first version of the test battery were rather impractical for the Zimbabwean setting and for the age in consideration. These findings suggest need to substitute, or develop new practical feasible tests for the assessment of these important variables.

There was consensus among rugby experts for the inclusion of speed in the SCRuM test battery; a finding confirming the importance of speed in rugby regardless of players position. Speed, which is required for evading opponents, breaking through defensive lines, and scoring tries, has been found to discriminate rugby players of different levels of competition and playing abilities [30, 44, 71–73]. For example, elite junior rugby players were found to have superior sprinting abilities when compared to sub-elite players in a study comparing the physiological and anthropometric characteristics of junior elite and sub-elite rugby players [73]. There is also evidence showing that speed is the most frequently assessed physiological characteristic among rugby players based on findings from a recent systematic review [10]. Motion studies have revealed that rugby players cover varied distances (4m-46m) in a single bout of intense sprinting [25, 32, 33, 43]. This probably accounts for the assessment of speed for over 5m to 60m distances in literature [10]. In the present study, the included speed tests (5m, 10m, 20m, and 40m) were found to be relevant and practically feasible for the Zimbabwean setting and for the intended target population. The tests reflect the speed demands in match play for both the forward and backline players. Shorter sprints (<20m) which assess acceleration ability mainly characterise forwards running and the longer sprints (<40m) assessing maximal velocity commonly observed in game play mainly reflect running distances for the backline players [33, 44, 74].

HIA are an integral component of rugby [20, 25, 27, 75] and therefore the ability to perform RHIE should be an essential requirement. By assessing RHIE, coaches are informed about the level of physical fitness of players for rugby [50]. Concomitantly, the ability to recover quickly from HIA performances (anaerobic capacity) in preparation for a repeated episode should also be important to assess. This probably accounts for experts ( $n = 3$ ) recommending for the removal of anaerobic capacity as measured by the Triple 120m shuttle run test, since the variable was perceived to be indirectly assessed with the RHIE test. Furthermore, rugby experts selected RHIE for inclusion instead of RSA and REA. Tests for RSA and REA have been challenged for under-estimating the HIA characterising rugby matches [36, 49, 50, 76]. This probably explains the inclusion of specific RHIE tests for both the forward and backline players in the SCRuM test battery. The RHIE test for the forwards had scrummaging episodes as compared to the RHIE test for the backline players, reflecting the importance of the ability to engage in frequent scrummaging for the forward players. However, the proposed RHIE tests showed marginal Test-Feasibility Index (36.5) suggesting possible feasible concerns with the test. The major concerns highlighted included; human personnel needed, time needed to implement the test and age-specific issues considering the specified intensities and durations of RHIE bouts for the test. Rugby experts felt that tests for RHIE probably captured the intensities and durations for professional senior rugby players and may be demanding for the young adolescent high school-children playing rugby. There is need, therefore, to design or adapt the test for junior rugby players to improve the face validity and feasibility of the test among young Zimbabwean rugby players.

There was also consensus for the inclusion of CODS/agility in the test battery. Rugby involves large amounts of acceleration, deceleration and multi-directional running over short distances for all the players regardless of position [17, 39, 44]. This requires rugby players to have good agility without losing balance. Higher agility skills allow rugby players to play in a fast and efficient manner [77]. Therefore, CODS/agility has been reported to be an important variable for rugby players to possess [4, 34, 73, 78–80]. This importance is also evidenced by the frequency of assessment of CODS/agility in rugby players by coaches and sports scientists [10, 81]. In the present study, the proposed test for CODS/agility was found to be relevant and practically feasible for implementation in the Zimbabwean setting. However, the procedural movements of the L-run test were perceived to be “generic” and “mentally rehearseable” leading to better performances. This does not mimic field play, which is characterised largely by unplanned movement patterns [56, 82]. Possibly, it is for this reason that the experts agreed for the inclusion of reactive agility in the test battery. Oorschot et al [11] found that reactive agility was one of the most commonly investigated skill in rugby. In addition, Gabbett et al [18] demonstrated that reactive agility successfully discriminated first grade from second grade rugby players, further suggesting the importance of reactive agility in rugby. However, in the present study, the proposed test for reactive agility had a low practical feasibility index ( $T\text{-FI} = 32.2$ ), indicating possible feasibility challenges with the execution of the test in the Zimbabwean setting. The major areas of concern reported included the equipment needed and the cost of purchasing the equipment. Considering the constraints associated with the assessment of reactive agility, Turner et al [56] recommended use of CODS/agility tests alone for the assessment of agility in soccer players. However, reactive agility seems to be an important variable in rugby as compared to soccer because of the nature of the sport which requires multiple changes of direction in response to stimuli. There is need to incorporate both tests of change of direction speed and reactive agility in protocol development, since episodes of (un) anticipated agile manoeuvres both occur in match play [79]. Nonetheless, there is need for development of new practically feasible tests for the assessment of perceptual or decision-making aspects of agility in young rugby players.

There was perfect agreement among the experts for inclusion of anthropometric assessments (height, mass and skinfold thickness), upper-and-lower muscular power and strength, and muscular flexibility in the test battery. These findings suggest to the importance of these variables in rugby considering the dynamic and physical nature of the sport. Since acquiring professional status in 1995, rugby has grown into a quicker, more dynamic sport with greater emphasis on well-developed physical characteristics of players [81, 83–85]. Rugby players are subjected to frequent and powerful contact situations such as scrummaging, tackling, mauling and rucking [84, 85] which require body mass, muscle flexibility, strength and power. Muscle flexibility optimises eccentric and concentric contraction of the muscle ensuring efficient generation of strength. Leg strength facilitates increased leg drive which assists in sprinting, scrummaging, lifting, and tackling [34]. In addition, muscular strength and power has been reported to reduce the risk of injuries [72]. Performance of game tasks such as kicking, jumping, and lifting also require muscular strength and power generation abilities. Successful teams in international rugby are reported to have had the heaviest and tallest players [30, 86, 87]. Contemporary elite rugby players are known to be physically imposing (bigger and stronger) compared to players of two decades ago [87]. Gabbett [38] found that body mass was an important determinant of selection into a rugby team. Measures of upper-and lower body muscular strength and power were found to discriminate rugby players by level of competition [3, 34, 80]. However, in the present study, proposed tests for lower and upper body strength had low practical feasibility mainly because of the weightlifting restrictions imposed for young high school athletes in the country. Coaches had concerns on a number of feasibility parameters such as the type of equipment needed, the cost of the equipment, safety concerns, and age-specificity of the test with regards to these weightlifting tests. Therefore, there is need to incorporate new tests in the SCRuM test battery for assessment of lower and upper body strength among young rugby players in the Zimbabwean setting.

There was consensus among rugby experts for the inclusion of measures for passing, catching and tackling in the SCRuM test battery. However, measures for kicking were excluded on the basis for being position dependent. These findings suggest to the importance of accuracy in passing, running and catching ability and tackling in the sport of rugby, warranting the inclusion of these skills in screening test batteries. Time motion analysis (TMA) studies identified passing and tackling as key discrete movement activities commonly observed in match play [17, 26, 39]. This is because rugby is a running, passing, catching game with physical collisions such as tackles occurring throughout the entire match [17, 88–90].

## Limitations

The study findings should be interpreted cognisant of number of limitations. The approach used for face and logical validation of the test battery can be criticised due to its potential for subjective and cognitive bias from the experts thereby influencing the validity of the results. However, attempts were made to draw experts from various countries for the different experiences. For the present study, 20 international and local rugby experts were used for this study. Nevertheless, it is possible that the content of the SCRuM test battery could have differed if different experts had been chosen. Achieving appropriate sample size and retaining experts in subsequent rounds was problematic with this study. Of the 63 experts invited, 20 and 9 participants participated in the first and second round, respectively. Therefore, the results reflect the opinions of experts who timeously responded and were willing to participate in the study. Nonetheless, all the experts were recruited based on expertise in the sport of rugby working in various capacities. In addition, literature is controversial on the ideal number of content

experts needed in a validation study, but suggestions point between 3 and 10 [68]. This potentially suggests that the sample sizes for the first and second round of the validation may have been appropriate.

Another limitation of the present study was that experts judged the relevance of performance measures for inclusion in the SCRuM test battery based only on anthropometric, physiological characteristics and rugby specific game skills. Due to the complexity of the sport, there are however several other factors, for example, sociological, psychological or perceptual-cognitive skills such as decision making ability, anticipation, tactical awareness which may influence playing performance [72] and may be important to include in test batteries for distinguishing young rugby players. Feasibility study results reflect the opinions and impressions of local rugby coaches used in this particular study considering the contextual resources available at the various schools in Harare, Zimbabwe that were selected. The results could have differed if other schools had been selected or if coaches with different coaching experiences had been used. The coaches used were also coaching at different levels of competition. This accounts for the results on practical feasibility for the upper-and-lower body muscular strength, since they are weight-lifting restrictions in the country depending on the age of the rugby players. Under 16 rugby players are not allowed to weight-lift as compared to the senior U-20 first team rugby players. In addition, the subjective nature of the data gathered may cover major practical feasibility issues which can become apparent during the implementation phase of the study. Therefore, there was need to assess other focus areas of feasibility besides practicality and acceptability issues. Feasibility of the SCRuM test battery could have been assessed in terms of demand (by actually documenting the use of the test battery by coaches in local context) or implementation (the extent, likelihood, and manner in which the SCRuM test battery is fully implemented as planned and proposed) [91]. However, this was not practical given the time limits this study had.

## Conclusion

Rugby is a highly demanding physical and skill-based sport [92]. This is reflected in the component items included as relevant in the SCRuM test battery for profiling young male rugby players which covers a wide range of physical or physiological qualities and skills. Results from face and logical validity studies revealed that the following variables were relevant to be included in the SCRuM test battery: anthropometric qualities (weight, height and skin fold measures), physiological characteristics (speed, RHIE performance ability, PHIIRA/endurance, CODS/agility, anaerobic capacity, upper and lower-body muscular power and strength, muscular flexibility), and rugby-specific game skills (reactive agility, passing for accuracy, tackling proficiency, and catching). The present findings could inform coaches and sports scientists on the relevant attributes, qualities and skills to assess among potential rugby talent. Most of the tests except for upper-and-lower muscular strength and reactive agility were perceived to be practical feasibility to be conducted in Zimbabwean setting. Therefore, there is need to incorporate new tests in the SCRuM test battery for assessment of lower-and-upper body strength and reactive agility in the Zimbabwean setting.

## Supporting information

**S1 Table. The SCRuM test battery and rationale for inclusion of the tests.**  
(DOCX)

**S1 Appendix. The practical feasibility questionnaire.**  
(DOCX)

## Acknowledgments

The authors would like to acknowledge all the key informants, local and international rugby experts who took part in all the three studies. Special thanks go to the Ministry of Primary and Secondary Education for the permissions to access schools for the collection of data. We gratefully acknowledge the input from Mrs Carryn Mhangara (physiotherapist at Parirenyatwa Group of Hospitals, rehabilitation department) for reading the project and providing incisive comments which shaped the structure of the manuscript. In addition, the authors would like to extend heartfelt thanks to the members of staff of the Rehabilitation Department for the support during manuscript writing.

## Author Contributions

**Conceptualization:** Matthew Chiwaridzo, Danai Chandahwa, Gillian Ferguson, Bouwien C. M. Smits-Engelsman.

**Formal analysis:** Matthew Chiwaridzo, Danai Chandahwa, Bouwien C. M. Smits-Engelsman.

**Investigation:** Matthew Chiwaridzo, Danai Chandahwa.

**Methodology:** Matthew Chiwaridzo.

**Project administration:** Matthew Chiwaridzo.

**Supervision:** Gillian Ferguson, Bouwien C. M. Smits-Engelsman.

**Writing – original draft:** Matthew Chiwaridzo.

**Writing – review & editing:** Danai Chandahwa, Sander Oorschot, Cathrine Tadyanemhandu, Jermaine M. Dambi, Gillian Ferguson, Bouwien C. M. Smits-Engelsman.

## References

1. Bleakley C, Tully M, O'Connor S. Epidemiology of adolescent rugby injuries: a systematic review. *Journal of Athletic Training*. 2011; 46(5): 555–565. PMID: [22488143](#)
2. Chiwaridzo M, Masunzambwa Y, Naidoo N, Kaseke F, Dambi JM, Matare T. Profile of rugby injuries in high school Zimbabwean adolescents. *International Journal of Sports and Exercise Science*. 2015; 1:5.
3. Argus CK, Gill ND, Keogh JWL. Characterization of the differences in strength and power between different levels of competition in rugby union athletes. *Journal of Strength and Conditioning Research*. 2012; 26(10): 2698–2704. <https://doi.org/10.1519/JSC.0b013e318241382a> PMID: [22105055](#)
4. Durandt J, du Toit S, Borresen J, Hew-Butler T, Masimla H, Jakoet I, et al. Fitness and body composition profiling of elite junior South African rugby players. *South African Journal of Sports Medicine*. 2006; 18(2): 38–45.
5. Till K, Jones BL, Cogley S, Morley D, O'Hara J, Chapman C, et al. Identifying talent in youth sport: A novel methodology using higher-dimensional analysis. *PLoS ONE*. 2016; 11(5): e0155047. <https://doi.org/10.1371/journal.pone.0155047> PMID: [27224653](#)
6. Heweston A. Talent identification and development: An investigation into the policies and practices of one New Zealand Rugby Provincial Union. MSc Thesis, University of Otago. 2016. <http://hdl.handle.net/10523/7014>.
7. Tredrea M, Descombe B, Sanctuary CE, Scanlan AT. The role of anthropometric, performance and psychological attributes in predicting selection into an elite development programme in older adolescent rugby league players. *Journal of Sports Sciences*. 2017; 35(19): 1897–1903. <https://doi.org/10.1080/02640414.2016.1241418> PMID: [27724178](#)
8. Hendricks S, Lambert M, Masimla H, Durandt J. Measuring skill in rugby union and rugby league as part of the standard team testing battery. *International Journal of Sport Science and Coaching*. 2015; 10(5): 949–965.
9. Kruger PE, Booysen C, Spamer EJ. A protocol and comparative norms for the identification and selection of talent among elite age group rugby players in South Africa. *International Journal of Education and Sports Science*. 2010; 5: 58–78.



10. Chiwaridzo M, Oorschot S, Dambi JM, Ferguson GD, Booney E, Mudawarima T, Tadyanemhandu C, Smits-Engelsman BCM. A systematic review investigating measurement properties of physiological tests in rugby. *BMC Sports Science, Medicine and Rehabilitation*. 2017; 9: 24. <https://doi.org/10.1186/s13102-017-0081-1> PMID: 29299317
11. Oorschot S, Chiwaridzo M, Smits-Engelsman BCM. Psychometric evaluation of commonly used game-specific skills tests in rugby: A systematic review. *BMJ Open Sport and Exercise Medicine*. 2017; 3: e000281. <https://doi.org/10.1136/bmjsem-2017-000281> PMID: 29259812
12. Chiwaridzo M, Ferguson GD, Smits-Engelsman BCM. A systematic review protocol investigating tests for physical or physiological qualities and game-specific skills commonly used in rugby and related sports and their psychometric properties. *Syst Rev*. 2015; 5: 122.
13. Robertson SJ, Burnett AF, Cochrane J. Tests examining skill outcomes in sport: A systematic review of measurement properties and feasibility. *Sports Med*. 2014; 44: 501–518. <https://doi.org/10.1007/s40279-013-0131-0> PMID: 24293244
14. Walker S, Turner AN. A one-day field test battery for the assessment of aerobic capacity, anaerobic capacity, speed, and agility of soccer players. *Strength and Conditioning Journal*. 2009; 31 (6): 52–60.
15. Larkin P, O'Connor D. Talent identification and recruitment in youth soccer: Recruiter's perceptions of the key attributes for player recruitment. *PLoS ONE*. 2017; 12(4): e0175716. <https://doi.org/10.1371/journal.pone.0175716> PMID: 28419175
16. Read D, Weaving D, Phibbs P, Darrall-Jones J, Roe G, Weakley J et al. Movement and physical demands of school and university rugby union match-play in England. *BMJ Open Sport Exerc Med*. 2017; 2:e000147. <https://doi.org/10.1136/bmjsem-2016-000147> PMID: 28879027
17. Duthie G, Pyne D, Hooper S. Time motion analysis of 2001 and 2002 super 12 rugby. *Journal of Sports Sciences*. 2005; 23(5): 523–530. <https://doi.org/10.1080/02640410410001730188> PMID: 16195000
18. Gabbett TJ, Kelly JN, Sheppard JM. Speed, change of direction speed, and reactive agility of rugby league players. *J Strength Cond Res*. 2008; 22 (1): 174–181 <https://doi.org/10.1519/JSC.0b013e31815ef700> PMID: 18296972
19. Hogarth LW, Burkett BJ, McKean MR. Match demands of professional rugby football codes: A review from 2008 to 2015. *International Journal of Sports Science & Coaching*. 2016; 11(3): 451–463.
20. Ziv G, Lidor R. On-field performances of rugby union players: A review. *Journal of Strength and Conditioning Research*. 2015; 30(3): 881–892
21. Quarrie KL, Hopkins WG, Anthony MJ, Gill ND. Positional demands of international rugby union: Evaluation of player actions and movements. *Journal of Science and Medicine in Sport*. 2012; 16: 353–359. <https://doi.org/10.1016/j.jsams.2012.08.005> PMID: 22975233
22. Coughlan GF, Green BS, Pook PT, Toolan E, O'Connor SP. Physical Game Demands in Elite Rugby Union: A Global Positioning System Analysis and Possible Implications for Rehabilitation. *Journal of Orthopaedic and Sports Physical Therapy*. 2011; 41(8): 600–605. <https://doi.org/10.2519/jospt.2011.3508> PMID: 21654094
23. Jones MR, West DJ, Crewther BT, Cook CJ, Kilduff LP. Quantifying positional and temporal movement patterns in professional rugby union using global positioning system. *European Journal of Sports Science*. 2015; 15(6): 488–496.
24. Lacombe M, Piscione J, Hager JP, Bourdin M. A new approach to quantifying physical demand in rugby union. 2014; 32 (3): 290–300.
25. Deutsch MU; Maw GJ, Jenkins D, Reaburn P. Heart rate, blood lactate and kinematic data of elite colts (under-19) rugby union players during competition. *Journal of Sports Sciences*. 1998; 16 (6): 561–570. <https://doi.org/10.1080/026404198366524> PMID: 9756260
26. Eaton C, George K. Position specific rehabilitation for rugby union players. Part 1: empirical movement analysis data. *Phys Ther Sport*. 2006; 7:22–29
27. Austin D, Gabbett T, Jenkins D. The physical demands of Super 14 rugby union. *J Sci Med Sport*. 2011; 14:259–263 <https://doi.org/10.1016/j.jsams.2011.01.003> PMID: 21324741
28. Roberts SP, Trewartha G, Higgitt RJ, El-Abd J, Stokes KA. The physical demands of elite English rugby union. *Journal of Sports Sciences*. 2008; 26 (88): 825–833.
29. Tee JC, Coopoo Y. Movement and impact characteristics of South African professional rugby union players. *South African Journal of Sports Medicine*. 2015; 27 (2): 33–39.
30. Darrall-Jones JD, Jones B, Till K. Anthropometric and physical profiles of English academy rugby union players. *J Strength Cond Res*. 2015; 29(8): 2086–2096. <https://doi.org/10.1519/JSC.0000000000000872> PMID: 25647656
31. Cunniffe B, Proctor W, Baker JS, Davies B. An evaluation of the physiological demands of elite rugby union using Global Positioning System tracking software. *J Strength Cond Res*. 2009; 23 (4): 1195–1203. <https://doi.org/10.1519/JSC.0b013e3181a3928b> PMID: 19528840

32. Suarez-Arrones JL, Portillo LJ, Gonzalez-Rave MJ, Munoz VE, Sanchez F. Match running performance in Spanish elite male rugby union using global positioning system. *Isokinetic and Exercise Science*. 2012; 20: 77–83.
33. Portillo J, Abiah P, Navia JA, Sanchez M, Abien-Vicen J. Movement patterns in Under-19 rugby union players: Evaluation of physical demands by playing position. *International Journal of Performance Analysis in Sport*. 2014; 14: 934–945.
34. Baker DG, Newton R. Comparison of lower body strength, power, acceleration, speed, agility and sprint momentum to describe and compare playing rank among professional rugby league players. *J Strength Cond Res*. 2008; 22(1): 153–158 <https://doi.org/10.1519/JSC.0b013e31815f9519> PMID: 18296969
35. Baker DG. Differences in Strength and Power among Junior-High, Senior-High, College-Aged, and Elite Professional Rugby League Players. *J Strength Cond Res*. 2002; 16(4): 581–585. PMID: 12423189
36. Gabbett TJ, Seibold AJ. Relationship between tests of physical qualities, team selection, and physical match performance in semi-professional rugby league players. *J Strength Cond Res*. 2013; 27(12): 3259–3265 <https://doi.org/10.1519/JSC.0b013e31828d6219> PMID: 23442268
37. Till K, Cobley S, Morley D, O'Hara J, Chapman C, Cooke C. The influence of age, playing position, anthropometry and fitness on career attainment outcomes in rugby league. *Journal of Sports Sciences*. 2016; 34(13): 1240–1245. <https://doi.org/10.1080/02640414.2015.1105380> PMID: 26512761
38. Till K, Jones B, Geeson-Brown. Do physical qualities influence the attainment of professional status within elite 16–19 year old rugby league players? *Journal of Science and Medicine in Sport*. 2016; 19: 585–589. <https://doi.org/10.1016/j.jsams.2015.07.001> PMID: 26197941
39. Deutsch MU, Kearney GA, Rehrer NJ. Time-motion analysis of professional rugby union players during match-play. *Journal of Sports Sciences*. 2017; 25 (4): 461–472.
40. Reid LC, Cowman JR, Green BS, Coughlan GF. Return to Play in Elite Rugby Union: Application of Global Positioning System Technology in Return-to-Running Programs. *Journal of Sports Rehabilitation*. 2013; 22: 122–129.
41. Reardon C, Tobin DP, Delahunt E. Application of individualised speed thresholds to interpret position-specific running demands in elite professional rugby union: A GPS study. *PLoS ONE*. 2015; 10 (7): e0133410. <https://doi.org/10.1371/journal.pone.0133410> PMID: 26208315
42. Vaz L, Figueira B, Goncalves B. Classifying youth rugby union players by training performances. *International Journal of Performance Analysis in Sport*. 2015; 15 (1): 159–171.
43. Duthie GM, Pyne D, Hooper S. The applied physiology and game analysis of rugby union. *Sports Medicine*. 2003; 33: 937–99.
44. Duthie GM, Pyne DB, Marsh DJ, Hooper SL. Sprint patterns in rugby union players during competition. *Journal of Strength and Conditioning Research*. 2006; 20 (1): 208–214. <https://doi.org/10.1519/R-16784.1> PMID: 16506864
45. Cahill N, Lamb K, Worsfold P, Headey R, Murray S. The movement characteristics of English Premiership rugby union players. *Journal of Sports Sciences*. 2013; 31(3): 229–237. <https://doi.org/10.1080/02640414.2012.727456> PMID: 23009129
46. Hartwig T, Naughton G, Searl J. Motion analyses of adolescent rugby union players: A comparison of training and game demands. *Journal of Strength and Conditioning Research*. 2011; 25 (4): 966–972. <https://doi.org/10.1519/JSC.0b013e3181d09e24> PMID: 20647941
47. Jones RM, Cook CC, Kilduff LP, Milanovic Z, James N, Sporis G et al. Relationship between repeated sprint ability and aerobic capacity in professional soccer players. *The Scientific World Journal*. 2013; <http://dx.doi.org/10.1155/2013/952350>
48. Gabbett TJ. Physiological and anthropometric characteristics of starters and non-starters in junior rugby league players, aged 13–17 years. *J Sports Med Phys Fitness*. 2009; 49(3): 233–239. PMID: 19861929
49. Austin DJ, Gabbett TJ, Jenkins DG. Reliability and sensitivity of a repeated high intensity exercise performance test for rugby league and rugby union. *J Strength Cond Res*. 2013; 27(4): 1128–1135. <https://doi.org/10.1519/JSC.0b013e31825fe941> PMID: 22652919
50. Johnston RD, Gabbett TJ. Repeated sprint and effort ability in rugby league players. *J Strength Cond Res*. 2011; 25(10): 2789–2795. <https://doi.org/10.1519/JSC.0b013e31820f5023> PMID: 21912282
51. Smart D, Hopkins WG, Quarrie KL, Gill N. The relationships between physical fitness and game behaviours in rugby union players. *European Journal of Sport Science*. 2014; 14 Sup 1: S8–S17.
52. Pienaar AE, Spamer MJ, Steyn HS. Identifying and developing rugby talent among 10-year-old boys: A practical model. *Journal of Sports Sciences*. 1998; 16(8): 691–699. <https://doi.org/10.1080/026404198366326> PMID: 10189074

53. Van Gent MM, Spamer EJ. Comparisons of positional groups in terms of anthropometric, rugby-specific skills, physical and motor components among U13, U 16, U 18 and U 19 Elite rugby players. *Kinesiology*. 2005; 37(1): 50–63.
54. Spamer EJ, De la Port. Anthropometric, physical, motor, and game-specific profiles of elite U-16 and U-18 year-old South African schoolboy rugby players. *Kinesiology*. 2006; 38(2): 176–184.
55. Rikli RE, Jones CJ. Development and validation of a functional fitness test battery for community-residing older adults. *Journal of Aging and Physical Activity*. 1999; 7: 129–161.
56. Turner A, Walker S, Stembridge M, Coneyworth P, Reed G, Birdsey L, et al. A testing battery for the assessment of fitness in soccer players. *Strength Cond*. 2011; 33(5): 29–39.
57. Natalio MA, Faria CDCM, Teixeira-Salmela LF, Michaelsen SM. Content validation of a clinical assessment instrument for stair ascent and descent in individuals with hemiparesis. *Braz J Phys Ther*. 2014; 18(4): 353–363. <https://doi.org/10.1590/bjpt-rbf.2014.0052> PMID: 25054384
58. Zamanzadeh V, Ghahramanian A, Rassouli M, Abbaszadeh A, Alavi-Majd H, Nikanfar AR. Design and implementation content validity study: Development of an instrument for measuring patient-centered communication. *Journal of Caring Sciences*. 2015; 4(2): 165–178. <https://doi.org/10.15171/jcs.2015.017> PMID: 26161370
59. Terwee CB, Bot SDM, de Boer MR, Van der Windt DAWM, Knol DL, Dekker J et al. Quality criteria were proposed for measurement properties of health status questionnaires. *Journal of Clinical Epidemiology*. 2007; 60: 34–42 <https://doi.org/10.1016/j.jclinepi.2006.03.012> PMID: 17161752
60. Bolarinwa OA. Principles and methods of validity and reliability testing of questionnaires used in social and health science researches. *Niger Postgrad Med J*. 2015; 22:195–201. <https://doi.org/10.4103/1117-1936.173959> PMID: 26776330
61. Mokkink LB, Terwee CB, Knol DL, Stratford PW, Alonso J, Patrick DL. The COSMIN checklist for evaluating the methodological quality of studies on measurement properties: A clarification of its content. *BMC Medical Research Methodology* 2010 10:22. <https://doi.org/10.1186/1471-2288-10-22> PMID: 20298572
62. Terwee CB, Prinsen CAC, Chiarotto A, Westerman MJ; Patrick DL, Alonso J et al. COSMIN methodology for evaluating the content validity of patient reported outcome measures: a Delphi study. *Quality of Life Research*. 2018; 27(5): 1159–1170. <https://doi.org/10.1007/s11136-018-1829-0> PMID: 29550964
63. Wilkinson M, Leedale-Brown D, Winter EM. Validity of a Squash-Specific Test of Change-of-Direction Speed. *International Journal of Sport Physiology and Performance*. 2009; 4: 176–185.
64. Hulse MA, Morris JG, Hawkins RD, Hodson A, Nevill AM, Nevill ME. A field-test battery for elite-young soccer players. *Int J Sports Med*. 2013; 34: 302–311. <https://doi.org/10.1055/s-0032-1312603> PMID: 23143702
65. Davis LL. Instrument review: getting the most from your panel of experts. *Appl Nurs Res*. 1992; 4(5):194–7.
66. Science for Sport. Top 100 Experts in Sport Science. <https://www.scienceforsport.com/top-100-experts-in-sports-science/>. Last accessed on 08 July 2018.
67. Larsson H, Tegern M, Monnier A, Skoglund J, Helander C, Persson E, et al. Content validity index and intra-and inter reliability of a new muscle strength/endurance test battery for Swedish soldiers. *PLoS ONE*. 2015; 10(7): e0132185. <https://doi.org/10.1371/journal.pone.0132185> PMID: 26177030
68. Polit DF, Beck CT. The content validity index: Are you sure you know what's being reported? Critique and recommendations. *Res Nurs Health*. 2006; 29: 489–97. <https://doi.org/10.1002/nur.20147> PMID: 16977646
69. Polit DF, Beck CT, Owen SV. Is the CVI an acceptable indicator of content validity? Appraisal and recommendations. *Res Nurs Health*. 2007; 30: 459–67. <https://doi.org/10.1002/nur.20199> PMID: 17654487
70. Robertson S, Kremer P, Aisbett B, Tran J, Cerin E. Consensus on measurement properties and feasibility of performance tests for the exercise and sport sciences: A Delphi study. *Sports Medicine-Open*. 2017; 3: 2. <https://doi.org/10.1186/s40798-016-0071-y> PMID: 28054257
71. Gabbett TJ. A comparison of physiological and anthropometric characteristics among playing position in junior rugby league players. *Br J Sports Med*. 2005; 39: 675–680. <https://doi.org/10.1136/bjism.2005.018275> PMID: 16118309
72. Hendricks S. Trainability of junior rugby union players. *South African Journal of Sports Medicine*. 2012; 24(4): 122–125.
73. Gabbett T, Kelly J, Ralph S, Driscoll D. Physiological and anthropometric characteristics of junior elite and sub-elite rugby league players with special reference to starters and non-starters. *Journal of Science and Medicine in Sport*. 2009; 12(1), 215–222. <https://doi.org/10.1016/j.jsams.2007.06.008> PMID: 18055259

74. Darrall-Jones JD, Jones B, Roe G, Till K. Reliability and usefulness of linear sprint testing in adolescent rugby union and league players. *Journal of Strength and Conditioning Research*. 2015b; 30(15): 1359–1364
75. Austin D, Gabbett T, Jenkins D. Repeated high-intensity exercise in professional rugby union. *Journal of Sports Sciences*. 2011; 1–8.
76. Gabbett TJ, Stein JG, Kemp JG, Lorenzen C. Relationship between tests of physical qualities, and physical match performances in elite rugby league players. *J Strength Cond Res*. 2013; 27(6): 1539–1545 <https://doi.org/10.1519/JSC.0b013e318274f236> PMID: 23037614
77. Condello G, Minganti C, Lupo C, Benvenuti C, Pacini D, Tessitore A. Evaluation of change of direction movements in young rugby players. *International Journal of Sports Physiology and Performance*. 2013; 8: 52–56 PMID: 22869638
78. Comfort P, Graham-Smith P, Matthews MJ, Bamber C. Strength and power characteristics in English elite rugby league players. *J Strength Cond Res*. 2011; 25(5): 1374–1384. <https://doi.org/10.1519/JSC.0b013e3181d687f5> PMID: 21116201
79. Green BS, Blake C, Caulfield BM. A valid field test protocol of linear speed and agility in rugby union. *J Strength Cond Res*. 2011; 25(5):1256–1262 <https://doi.org/10.1519/JSC.0b013e3181d8598b> PMID: 21116198
80. Till K, Cogley S, O'Hara J, Brightmore A, Cooke C, Chapman C. Using anthropometric and performance characteristics to predict selection in junior UK rugby league players. *Journal of Science and Medicine in Sport*. 2011; 14(3): 264–269. <https://doi.org/10.1016/j.jsams.2011.01.006> PMID: 21382749
81. Jones TW, Smith A, Macnaughton LS, Duncan NF. Strength and conditioning and concurrent training practices in elite rugby union. *Journal of Strength and Conditioning Research*. 2016; 30(12): 3354–3366. <https://doi.org/10.1519/JSC.0000000000001445> PMID: 27870696
82. Serpell BG, Ford M, Young WB. The development of a new test of agility for rugby league. *J Strength Cond Res*. 2010; 24(12): 3270–3277 <https://doi.org/10.1519/JSC.0b013e3181b60430> PMID: 19996775
83. Archibald HAP, Rankin AT, Webb M, Nicholas R, Earnes NWA, Wilson RK, Henderson LA, Heyes GJ, Bleakley CM. RISUS study: Rugby Injury Surveillance in Ulster Schools. *Br J Sports Med*. 2017; 51: 600–606 <https://doi.org/10.1136/bjsports-2015-095491> PMID: 26701931
84. Krak W, Coetzee F, Venter R. An analysis of the general match profile of international rugby union between 2007 and 2013. *International Journal of Performance Analysis in Sport*. 2017; 17 (3): 303–318.
85. Kobal R, Nakamura FY, Moraes JE, Coelho M, Kitamura K, Cal Abad CC et al. Physical performance of Brazilian rugby players from different age categories and competitive levels. *Journal of Strength and Conditioning Research*. 2016; 30(9): 2433–2439. <https://doi.org/10.1519/JSC.0000000000001348> PMID: 26817744
86. Durandt J, Green M, Masimla H, Lambert M. Changes in body mass, stature and BMI in South Africa elite U18 rugby players from different racial groups from 2002–2012. *Journal of Sports Sciences*. 2018; 36 (5): 477–484. <https://doi.org/10.1080/02640414.2017.1317103> PMID: 28423991
87. Lombard WP, Durandt JJ, Masimla H, Green M, Lambert M. Changes in body size and physical characteristics of South African under-20 rugby union players over a 13-year period. *J Strength Cond Res*. 2015; 29(4):980–988. <https://doi.org/10.1519/JSC.0000000000000724> PMID: 25387267
88. Gabbett TJ, Jenkin DG, Abernethy B. Relationship between physiological, anthropometric, and skill qualities and playing performance in professional rugby. *Journal of Sports Science*. 2011; 29:1655–1664.
89. Hendricks S, den Hollander S, Tam N, Brown J, Lambert M. The relationships between rugby players' tackle training attitudes and behaviour and their match tackle attitudes and behaviour. *BMJ Open Sport Exerc Med*. 2015; 0:e000046. <https://doi.org/10.1136/bmjsem-2015-000046> PMID: 27900133
90. Hendricks S, Till K, Brown JC, Jones B. Rugby union needs a contact skill-training programme. *Br J Sports Med*. 2017; 51: 829–830. <https://doi.org/10.1136/bjsports-2016-096347> PMID: 27821386
91. Bowen DJ, Kreuter M, Spring B, Cofta-Woerpel L, Linnan L, Weiner D, et al. How we design feasibility studies. *Am J Prev Med*. 2009; 36(5): 452–457. <https://doi.org/10.1016/j.amepre.2009.02.002> PMID: 19362699
92. Duthie GM. A framework for the physical development of elite rugby union players. *International Journal of Sports Physiology and Performance*. 2006; 1: 2–13. PMID: 19114733
